## Highly Robust Prediction of Lung Nodule Malignancy by Deep Learning Model: A Multiracial, Multinational Study

Hao Wu, Wen Tang, Chun Wu, Yufeng Deng, Rongguo Zhang

The authors have withdrawn this manuscript because the authors have discovered errors in the methods and data analysis, which could alter the conclusions of the manuscript.

Therefore, the authors do not wish this work to be cited as reference for the project. If you have any questions, please contact the corresponding author.
